# Supplementary material for: The performance of seven QPrediction risk scores in an independent external sample of patients from general practice: a validation study
Source: HighWire-hosted journal article supplement (doi:10.1136/bmjopen-2014-005809), 2014-08-01
Supplement: bmjopen-2014-005809supp.pdf [file bmjopen-2014-005809supp.pdf]

**Web extra table 1. Numbers of patients in CPRD and QResearch by geographical area**

|                 | <i>CPRD</i>      | <i>Col %</i>  | <i>QResearch</i> | <i>Col %</i>  |
|-----------------|------------------|---------------|------------------|---------------|
| East Midlands   | 109,428          | 3.3           | 500,970          | 7.4           |
| East of England | 397,008          | 12.1          | 528,379          | 7.8           |
| London          | 563,353          | 17.2          | 1,711,956        | 25.3          |
| North East      | 59,558           | 1.8           | 269,695          | 4.0           |
| North West      | 474,457          | 14.5          | 830,047          | 12.3          |
| South Central   | 411,571          | 12.6          | 696,070          | 10.3          |
| South East      | 362,319          | 11.1          | 545,811          | 8.1           |
| South West      | 397,735          | 12.2          | 700,041          | 10.4          |
| West Midlands   | 348,614          | 10.7          | 589,548          | 8.7           |
| Yorks & Humber  | 147,469          | 4.5           | 386,132          | 5.7           |
| <b>Total</b>    | <b>3,271,512</b> | <b>100.00</b> | <b>6,758,649</b> | <b>100.00</b> |

**Web table 2 Recording of ethnicity and family history of coronary heart disease (FH CHD) by geographical area**

|                 | CPRD linked data  |                       |                    |                |                   | QResearch             |                  |             |                |             | Ratio recording<br>QResearch:CPRD |            |
|-----------------|-------------------|-----------------------|--------------------|----------------|-------------------|-----------------------|------------------|-------------|----------------|-------------|-----------------------------------|------------|
|                 | total<br>patients | ethnicity<br>recorded | FH CHD<br>recorded |                | total<br>patients | ethnicity<br>recorded | FH CHD recorded  |             |                |             | ethnicity                         | FH         |
|                 | count             | count                 | Row<br>%           | count          | Row<br>%          | count                 | count            | Row<br>%    | count          | Row %       |                                   |            |
| East Midlands   | 109,428           | 23,636                | 21.6               | 7,912          | 7.2               | 500,970               | 284,194          | 56.7        | 60,278         | 12.0        | 2.6                               | 1.7        |
| East of England | 397,008           | 127,427               | 32.1               | 17,597         | 4.4               | 528,379               | 319,742          | 60.5        | 54,252         | 10.3        | 1.9                               | 2.3        |
| London          | 563,353           | 308,285               | 54.7               | 21,034         | 3.7               | 1,711,956             | 1,095,835        | 64.0        | 162,282        | 9.5         | 1.2                               | 2.5        |
| North East      | 59,558            | 17,140                | 28.8               | 3,326          | 5.6               | 269,695               | 195,127          | 72.4        | 43,168         | 16.0        | 2.5                               | 2.9        |
| North West      | 474,457           | 196,987               | 41.5               | 25,915         | 5.5               | 830,047               | 460,640          | 55.5        | 112,718        | 13.6        | 1.3                               | 2.5        |
| South Central   | 411,571           | 140,448               | 34.1               | 16,989         | 4.1               | 696,070               | 380,908          | 54.7        | 73,051         | 10.5        | 1.6                               | 2.5        |
| South East      | 362,319           | 90,633                | 25.0               | 12,618         | 3.5               | 545,811               | 262,861          | 48.2        | 45,765         | 8.4         | 1.9                               | 2.4        |
| South West      | 397,735           | 137,806               | 34.6               | 17,829         | 4.5               | 700,041               | 375,155          | 53.6        | 75,091         | 10.7        | 1.5                               | 2.4        |
| West Midlands   | 348,614           | 148,012               | 42.5               | 20,375         | 5.8               | 589,548               | 347,479          | 58.9        | 63,412         | 10.8        | 1.4                               | 1.8        |
| Yorks & Humber  | 147,469           | 56,340                | 38.2               | 6,195          | 4.2               | 386,132               | 214,702          | 55.6        | 54,515         | 14.1        | 1.5                               | 3.4        |
| <b>Total</b>    | <b>3,271,512</b>  | <b>1,246,714</b>      | <b>38.1</b>        | <b>149,790</b> | <b>4.6</b>        | <b>6,758,649</b>      | <b>3,936,643</b> | <b>58.2</b> | <b>744,532</b> | <b>11.0</b> | <b>1.5</b>                        | <b>2.4</b> |

**Web extra table 3 comparison of baseline characteristics for the CPRD cohort with linked data used for the validation cohort in this study and the CPRD cohort without linked data (which was not used for the validation of the QPrediction scores).**

|                                | <b>CPRD linked data</b> | <b>CPRD unlinked data</b> |
|--------------------------------|-------------------------|---------------------------|
| female                         | 1682709 (51.4)          | 1166103 (51.3)            |
| male                           | 1588803 (48.6)          | 1108235 (48.7)            |
| 25-34 years                    | 895167 (27.4)           | 665645 (29.3)             |
| 35-44 years                    | 760830 (23.3)           | 503091 (22.1)             |
| 45-54 years                    | 571937 (17.5)           | 384686 (16.9)             |
| 55-64 years                    | 424453 (13.0)           | 293826 (12.9)             |
| 65-74 years                    | 312352 (9.5)            | 216937 (9.5)              |
| 75+ years                      | 306773 (9.4)            | 210153 (9.2)              |
|                                |                         |                           |
| <b>Ethnicity recorded</b>      | 1246714 (38.1)          | 645829 (28.4)             |
| White or not recorded          | 3117325 (95.3)          | 2209396 (97.1)            |
| Indian                         | 32467 (1.0)             | 11751 (0.5)               |
| Pakistani                      | 12752 (0.4)             | 6358 (0.3)                |
| Bangladeshi                    | 4107 (0.1)              | 2682 (0.1)                |
| Other Asian                    | 22668 (0.7)             | 8854 (0.4)                |
| Caribbean                      | 11414 (0.3)             | 4812 (0.2)                |
| Black African                  | 27654 (0.8)             | 9751 (0.4)                |
| Chinese                        | 7090 (0.2)              | 3416 (0.2)                |
| Other ethnic group             | 36035 (1.1)             | 17318 (0.8)               |
|                                |                         |                           |
| <b>Smoking status recorded</b> | 3037626 (92.9)          | 2066777 (90.9)            |
| Non smoker                     | 1448554 (44.3)          | 1006511 (44.3)            |
| Ex-smoker                      | 475488 (14.5)           | 306460 (13.5)             |
| Light smoker (1-9/day)         | 214330 (6.6)            | 127487 (5.6)              |
| Moderate smoker (10-19/day)    | 362391 (11.1)           | 277693 (12.2)             |
| Heavy smoker (20+/day)         | 229912 (7.0)            | 159718 (7.0)              |
| Smoker amount not recorded     | 306951 (9.4)            | 188908 (8.3)              |
|                                |                         |                           |
| <b>Alcohol status recorded</b> | 2617112 (80.0)          | 1759758 (77.4)            |
| Non drinker                    | 482513 (14.7)           | 361566 (15.9)             |
| Trivial <1u/day                | 1186942 (36.3)          | 754470 (33.2)             |
| Light 1-2u/day                 | 701808 (21.5)           | 479407 (21.1)             |
| Moderate 3-6/day               | 203091 (6.2)            | 135130 (5.9)              |
| Heavy 7-9u/day                 | 22465 (0.7)             | 15645 (0.7)               |
| Very Heavy >/day               | 20293 (0.6)             | 13540 (0.6)               |
|                                |                         |                           |
| <b>family history</b>          |                         |                           |
| family history of CHD          | 149790 (4.6)            | 97401 (4.3)               |
| family history of diabetes     | 229200 (7.0)            | 144713 (6.4)              |
| family history osteoporosis    | 10942 (0.3)             | 6164 (0.3)                |
| family history kidney disease  | 2839 (0.1)              | 1592 (0.1)                |
|                                |                         |                           |

|                                       |               |               |
|---------------------------------------|---------------|---------------|
| <b>prescribed medication</b>          |               |               |
| antidepressants                       | 337350 (10.3) | 232657 (10.2) |
| anticoagulants                        | 29032 (0.9)   | 20338 (0.9)   |
| antipsychotics                        | 113398 (3.5)  | 76819 (3.4)   |
| oral NSAIDs                           | 592931 (18.1) | 425739 (18.7) |
| tamoxifen                             | 9343 (0.3)    | 6107 (0.3)    |
| antiplatelets                         | 190291 (5.8)  | 137793 (6.1)  |
| oestrogen only HRT                    | 119413 (3.7)  | 75448 (3.3)   |
| corticosteroids                       | 116949 (3.6)  | 70793 (3.1)   |
| oral contraceptive pill               | 174288 (5.3)  | 126218 (5.5)  |
|                                       |               |               |
| <b>recorded diagnoses</b>             |               |               |
| congestive cardiac failure            | 35543 (1.1)   | 25823 (1.1)   |
| atrial fibrillation                   | 40227 (1.2)   | 27032 (1.2)   |
| coronary heart disease                | 138080 (4.2)  | 102493 (4.5)  |
| cardiovascular disease                | 184597 (5.6)  | 134650 (5.9)  |
| rheumatoid arthritis                  | 24711 (0.8)   | 17427 (0.8)   |
| chronic renal disease                 | 8050 (0.2)    | 5774 (0.3)    |
| type 1 diabetes                       | 11162 (0.3)   | 7778 (0.3)    |
| type 2 diabetes                       | 94905 (2.9)   | 63240 (2.8)   |
| venous thromboembolism                | 38162 (1.2)   | 23593 (1.0)   |
| varicose veins                        | 65991 (2.0)   | 44717 (2.0)   |
| moderate/severe kidney failure        | 23607 (0.7)   | 15072 (0.7)   |
| severe kidney failure                 | 2728 (0.1)    | 1839 (0.1)    |
| oesophageal varices                   | 809 (0.0)     | 674 (0.0)     |
| inflammatory bowel disease            | 19170 (0.6)   | 13095 (0.6)   |
| SLE                                   | 1984 (0.1)    | 1273 (0.1)    |
| peripheral vascular disease           | 30130 (0.9)   | 23066 (1.0)   |
| dementia                              | 23320 (0.7)   | 15858 (0.7)   |
| Parkinson's disease                   | 9222 (0.3)    | 5854 (0.3)    |
| cancer                                | 70774 (2.2)   | 45637 (2.0)   |
| liver disease                         | 6852 (0.2)    | 5041 (0.2)    |
| malabsorption                         | 16718 (0.5)   | 12007 (0.5)   |
| endocrine diseases                    | 17179 (0.5)   | 12479 (0.5)   |
| COPD                                  | 44766 (1.4)   | 33190 (1.5)   |
| chronic liver disease or pancreatitis | 9572 (0.3)    | 6899 (0.3)    |
| renal stones                          | 19858 (0.6)   | 14935 (0.7)   |
| care home resident                    | 4873 (0.1)    | 2859 (0.1)    |
| falls                                 | 90783 (2.8)   | 53221 (2.3)   |
| prior fracture                        | 70017 (2.1)   | 50346 (2.2)   |
| asthma or COPD                        | 312477 (9.6)  | 207765 (9.1)  |
| treated hypertension                  | 285293 (8.7)  | 190707 (8.4)  |
| platelets < 150 or > 480              | 24333 (0.7)   | 12651 (0.6)   |
| emergency admission or hip op         | 8749 (0.3)    | 6468 (0.3)    |
| prior haemorrhage                     | 177327 (5.4)  | 122024 (5.4)  |

|                                |                |                |
|--------------------------------|----------------|----------------|
|                                |                |                |
| <b>Recorded values</b>         |                |                |
| BMI recorded                   | 2750153 (84.1) | 1864134 (82.0) |
| SBP recorded                   | 2949786 (90.2) | 2010003 (88.4) |
| cholesterol/HDL ratio recorded | 1193900 (36.5) | 761573 (33.5)  |
| platelets recorded             | 606260 (18.5)  | 302478 (13.3)  |
| mean age (SD)                  | 47.9 (17.0)    | 47.4 (17.2)    |
| mean townsend score (SD)       | -.5 (3.2)      | .1 (3.7)       |
| mean BMI (SD)                  | 28.9 (6.9)     | 29.2 (7.1)     |
| mean cholesterol ratio (SD)    | 4.1 (1.4)      | 4.1 (1.4)      |
| mean SBP(SD)                   | 130.7 (23.2)   | 130.1 (151.3)  |

Web extra table 4 Number of cases of upper gastrointestinal bleed and intracranial bleed on CPRD and QResearch (one third sample database). Incidence rates per 1000 pyrs have been standardised to the QResearch population in 5 year bands.

|                           | <i>CPRD validation</i> |                                                    | <i>QResearch validation</i> |                                                    |
|---------------------------|------------------------|----------------------------------------------------|-----------------------------|----------------------------------------------------|
|                           | cases on               | age standardised<br>Incidence rate per<br>1000pyrs | cases                       | Age standardised<br>Incidence rate per<br>1000pyrs |
|                           |                        |                                                    |                             |                                                    |
| no anticoagulants         | 13,314                 | 1.41 (1.39 to 1.43)                                | 6,447                       | 1.33 (1.30 to 1.36)                                |
| anticoagulants            | 359                    | 6.70 (4.06 to 9.34)                                | 153                         | 6.10 (3.20 to 8.98)                                |
|                           |                        |                                                    |                             |                                                    |
| <b>Intracranial bleed</b> |                        |                                                    |                             |                                                    |
| no anticoagulants         | 5,190                  | 0.53 (0.51 to 0.54)                                | 2,716                       | 0.56 (0.54 to 0.58)                                |
| anticoagulants            | 233                    | 2.45 (1.23 to 3.68)                                | 104                         | 2.87 (1.11 to 4.39)                                |

**Web extra table 5 Performance of QPrediction scores on the CPRD validation cohort, restricted to patients with complete data for relevant laboratory and clinical values**

|                                     |                    | <i>CPRD</i>            | <i>CPRD</i>            |
|-------------------------------------|--------------------|------------------------|------------------------|
|                                     |                    | women                  | men                    |
|                                     | statistic          | mean (95%CI)           | mean (95%CI)           |
| QDiabetes-2013                      | ROC                | 0.849 (0.847 to 0.85)  | 0.814 (0.813 to 0.816) |
| (type 2 diabetes)                   | R <sup>2</sup> (%) | 49.8 (49.4 to 50.2)    | 44.4 (44 to 44.8)      |
|                                     | D statistic        | 2.04 (2.024 to 2.056)  | 1.828 (1.814 to 1.842) |
| QKidney-2010                        | ROC                | 0.847 (0.842 to 0.852) | 0.839 (0.835 to 0.842) |
| (moderate or severe kidney failure) | R <sup>2</sup> (%) | 53.4 (52.8 to 54)      | 49.7 (49.3 to 50.1)    |
|                                     | D statistic        | 2.19 (2.165 to 2.215)  | 2.036 (2.018 to 2.054) |
| QKidney -2010                       | ROC                | 0.816 (0.798 to 0.834) | 0.808 (0.795 to 0.822) |
| (severe kidney failure)             | R <sup>2</sup> (%) | 47.3 (45.2 to 49.4)    | 46.1 (44.5 to 47.7)    |
|                                     | D statistic        | 1.938 (1.856 to 2.02)  | 1.895 (1.834 to 1.956) |
| QRISK2-2014                         | ROC                | 0.791 (0.787 to 0.796) | 0.757 (0.753 to 0.761) |
| (cardiovascular disease)            | R <sup>2</sup> (%) | 40.9 (40 to 41.8)      | 31.8 (30.9 to 32.7)    |
|                                     | D statistic        | 1.704 (1.673 to 1.735) | 1.398 (1.371 to 1.425) |
| QStroke-2013                        | ROC                | 0.794 (0.79 to 0.797)  | 0.771 (0.768 to 0.774) |
| (ischaemic stroke or TIA)           | R <sup>2</sup> (%) | 42.1 (41.4 to 42.8)    | 36.6 (35.9 to 37.3)    |
|                                     | D statistic        | 1.747 (1.723 to 1.771) | 1.557 (1.535 to 1.579) |
| QThrombosis-2010                    | ROC                | 0.755 (0.75 to 0.76)   | 0.762 (0.756 to 0.767) |
| (venous thromboembolism)            | R <sup>2</sup> (%) | 34.6 (33.8 to 35.4)    | 32.6 (31.7 to 33.5)    |
|                                     | D statistic        | 1.487 (1.462 to 1.512) | 1.424 (1.395 to 1.453) |
| QBleed-20141                        | ROC statistic      | 0.773 (0.766 to 0.779) | 0.751 (0.744 to 0.758) |
| (upper GI bleed)                    | R <sup>2</sup> (%) | 43.6 (42.1 to 45.1)    | 39.6 (38.1 to 41.1)    |
|                                     | D statistic        | 1.799 (1.744 to 1.854) | 1.658 (1.605 to 1.711) |
| QBleed-2014                         | ROC statistic      | 0.812 (0.803 to 0.822) | 0.791 (0.78 to 0.802)  |
| (intracranial bleed)                | R <sup>2</sup> (%) | 53 (51 to 55)          | 50.2 (48 to 52.4)      |
|                                     | D statistic        | 2.172 (2.086 to 2.258) | 2.057 (1.967 to 2.147) |
| QFracture-2012                      | ROC                | 0.899 (0.896 to 0.901) | 0.866 (0.86 to 0.872)  |
| (fracture neck of femur)            | R <sup>2</sup> (%) | 70.4 (69.9 to 70.9)    | 67.1 (66.2 to 68)      |
|                                     | D statistic        | 3.159 (3.124 to 3.194) | 2.922 (2.861 to 2.983) |
| QFracture -2012                     | ROC                | 0.819 (0.816 to 0.821) | 0.757 (0.751 to 0.763) |
| (osteoporotic fracture)             | R <sup>2</sup> (%) | 53.9 (53.4 to 54.4)    | 46.1 (45 to 47.2)      |
|                                     | D statistic        | 2.213 (2.189 to 2.237) | 1.893 (1.852 to 1.934) |
